# Supplementary material for: Molecular Identification and Novel Mitochondrial COI Gene Haplotypes of Nesting Kemp’s Ridley Turtles (Lepidochelys kempii) in Rancho Nuevo Sanctuary, Mexico
Source: MDPI journal article supplement (doi:10.3390/d14050390), 2022-05-14
Supplement: s1 [file s1]

**Table S1.** Relationship of COI sequences for haplotypes, ID, previous haplotypes, BOLD ID, GenBank accession, and countries for Kemp's ridley (*Lepidochelys kempii*) in Mexico, 2018-2019 and other previously published sequences.

| HAPLOTYPES | ID        | PREVIOUS | BOLD ID     | GENBANK   | COUNTRY                                       | REFERENCE |
|------------|-----------|----------|-------------|-----------|-----------------------------------------------|-----------|
|            | HAPLOTYPE |          |             | ACCESSION |                                               |           |
|            | 002_RN    | NA       | LKRNC002-20 | NA        | Rancho Nuevo, Aldama, Tamaulipas, Mexico      |           |
|            | 003_RN    | NA       | LKRNC037-21 | NA        | Rancho Nuevo, Aldama, Tamaulipas, Mexico      |           |
|            | 004_RN    | NA       | LKRNC038-21 | NA        | Rancho Nuevo, Aldama, Tamaulipas, Mexico      |           |
|            | 005_TE*   | NA       | LKRNC003-20 | NA        | Tepehuaje, Soto La Marina, Tamaulipas, Mexico |           |
|            | 006_MI*   | NA       | LKRNC004-20 | NA        | Miramar, Ciudad Madero, Tamaulipas, Mexico    |           |
|            | 007_AL*   | NA       | LKRNC005-20 | NA        | Altamira, Tamaulipas, Mexico                  |           |
|            | 008_RN    | NA       | LKRNC021-21 | NA        | Rancho Nuevo, Aldama, Tamaulipas, Mexico      |           |
|            | 009_MI*   | NA       | LKRNC006-20 | NA        | Miramar, Ciudad Madero, Tamaulipas, Mexico    |           |
|            | 010_RN    | NA       | LKRNC007-20 | NA        | Rancho Nuevo, Aldama, Tamaulipas, Mexico      |           |
|            | 011_AL*   | NA       | LKRNC008-20 | NA        | Altamira, Tamaulipas, Mexico                  |           |
|            | 012_RN    | NA       | LKRNC009-20 | NA        | Rancho Nuevo, Aldama, Tamaulipas, Mexico      |           |
|            | 013_MI*   | NA       | LKRNC010-20 | NA        | Miramar, Ciudad Madero, Tamaulipas, Mexico    |           |
|            | 014_RN    | NA       | LKRNC011-20 | NA        | Rancho Nuevo, Aldama, Tamaulipas, Mexico      |           |
|            | 015_RN    | NA       | LKRNC040-21 | NA        | Rancho Nuevo, Aldama, Tamaulipas, Mexico      |           |
|            | 016_RN    | NA       | LKRNC041-21 | NA        | Rancho Nuevo, Aldama, Tamaulipas, Mexico      |           |
|            | 017_RN    | NA       | LKRNC042-21 | NA        | Rancho Nuevo, Aldama, Tamaulipas, Mexico      |           |
|            | 018_RN    | NA       | LKRNC043-21 | NA        | Rancho Nuevo, Aldama, Tamaulipas, Mexico      |           |
|            | 019_RN    | NA       | LKRNC044-21 | NA        | Rancho Nuevo, Aldama, Tamaulipas, Mexico      |           |
|            | 020_RN    | NA       | LKRNC045-21 | NA        | Rancho Nuevo, Aldama, Tamaulipas, Mexico      |           |
|            | 021_RN    | NA       | LKRNC046-21 | NA        | Rancho Nuevo, Aldama, Tamaulipas, Mexico      |           |
|            | 022_RN    | NA       | LKRNC047-21 | NA        | Rancho Nuevo, Aldama, Tamaulipas, Mexico      |           |
|            | 023_RN    | NA       | LKRNC048-21 | NA        | Rancho Nuevo, Aldama, Tamaulipas, Mexico      |           |
|            | 024_RN    | NA       | LKRNC049-21 | NA        | Rancho Nuevo, Aldama, Tamaulipas, Mexico      |           |
|            | 025_RN    | NA       | LKRNC050-21 | NA        | Rancho Nuevo, Aldama, Tamaulipas, Mexico      |           |
|            | 026_AL*   | NA       | LKRNC012-20 | NA        | Altamira, Tamaulipas, Mexico                  |           |

|         |          |    |             |    |                                               |           |
|---------|----------|----|-------------|----|-----------------------------------------------|-----------|
|         | 027_AL*  | NA | LKRNC013-20 | NA | Altamira, Tamaulipas, Mexico                  |           |
|         | 028_RN   | NA | LKRNC051-21 | NA | Rancho Nuevo, Aldama, Tamaulipas, Mexico      | This work |
|         | 030_RN   | NA | LKRNC052-21 | NA | Rancho Nuevo, Aldama, Tamaulipas, Mexico      |           |
|         | 031_AL*  | NA | LKRNC014-20 | NA | Altamira, Tamaulipas, Mexico                  |           |
|         | 032_BT * | NA | LKRNC034-21 | NA | Barra del Tordo, Aldama, Tamaulipas, Mexico   |           |
|         | 033_BT * | NA | LKRNC035-21 | NA | Barra del Tordo, Aldama, Tamaulipas, Mexico   |           |
|         | 034_TE * | NA | LKRNC015-20 | NA | Tepehuaje, Soto La Marina, Tamaulipas, Mexico |           |
|         | 035_RN   | NA | LKRNC016-20 | NA | Rancho Nuevo, Aldama, Tamaulipas, Mexico      |           |
|         | 036_RN   | NA | LKRNC053-21 | NA | Rancho Nuevo, Aldama, Tamaulipas, Mexico      |           |
|         | 038_RN   | NA | LKRNC017-20 | NA | Rancho Nuevo, Aldama, Tamaulipas, Mexico      |           |
|         | 039_RN   | NA | LKRNC018-20 | NA | Rancho Nuevo, Aldama, Tamaulipas, Mexico      |           |
|         | 040_RN   | NA | LKRNC019-21 | NA | Rancho Nuevo, Aldama, Tamaulipas, Mexico      |           |
|         | 041_RN   | NA | LKRNC055-21 | NA | Rancho Nuevo, Aldama, Tamaulipas, Mexico      |           |
|         | 042_RN   | NA | LKRNC020-21 | NA | Rancho Nuevo, Aldama, Tamaulipas, Mexico      |           |
|         | 044_RN   | NA | LKRNC022-21 | NA | Rancho Nuevo, Aldama, Tamaulipas, Mexico      |           |
|         | 045_RN   | NA | LKRNC023-21 | NA | Rancho Nuevo, Aldama, Tamaulipas, Mexico      |           |
|         | 046_RN   | NA | LKRNC024-21 | NA | Rancho Nuevo, Aldama, Tamaulipas, Mexico      |           |
|         | 047_RN   | NA | LKRNC025-21 | NA | Rancho Nuevo, Aldama, Tamaulipas, Mexico      |           |
|         | 048_AL   | NA | LKRNC026-21 | NA | Rancho Nuevo, Aldama, Tamaulipas, Mexico      |           |
|         | 049_RN   | NA | LKRNC027-21 | NA | Rancho Nuevo, Aldama, Tamaulipas, Mexico      |           |
| LK-RN01 | 050_RN   | NA | LKRNC028-21 | NA | Rancho Nuevo, Aldama, Tamaulipas, Mexico      |           |
|         | 051_AL * | NA | LKRNC029-21 | NA | Altamira, Tamaulipas, Mexico                  |           |
|         | 052_RN   | NA | LKRNC030-21 | NA | Rancho Nuevo, Aldama, Tamaulipas, Mexico      |           |
|         | 053_RN   | NA | LKRNC031-21 | NA | Rancho Nuevo, Aldama, Tamaulipas, Mexico      |           |
|         | 054_RN   | NA | LKRNC032-21 | NA | Rancho Nuevo, Aldama, Tamaulipas, Mexico      |           |
|         | 055_AL*  | NA | LKRNC033-21 | NA | Altamira, Tamaulipas, Mexico                  |           |
|         | 056_RN   | NA | LKRNC056-21 | NA | Rancho Nuevo, Aldama, Tamaulipas, Mexico      |           |
|         | 057_RN   | NA | LKRNC057-21 | NA | Rancho Nuevo, Aldama, Tamaulipas, Mexico      |           |
|         | 058_RN   | NA | LKRNC058-21 | NA | Rancho Nuevo, Aldama, Tamaulipas, Mexico      |           |

|        |    |             |    |                                          |
|--------|----|-------------|----|------------------------------------------|
| 059_RN | NA | LKRNC059-21 | NA | Rancho Nuevo, Aldama,Tamaulipas, Mexico  |
| 061_RN | NA | LKRNC060-21 | NA | Rancho Nuevo, Aldama, Tamaulipas, Mexico |
| 062_RN | NA | LKRNC061-21 | NA | Rancho Nuevo, Aldama,Tamaulipas, Mexico  |
| 063_RN | NA | LKRNC062-21 | NA | Rancho Nuevo, Aldama, Tamaulipas, Mexico |
| 064_RN | NA | LKRNC063-21 | NA | Rancho Nuevo, Aldama,Tamaulipas, Mexico  |
| 065_RN | NA | LKRNC064-21 | NA | Rancho Nuevo, Aldama,Tamaulipas, Mexico  |
| 066_RN | NA | LKRNC065-21 | NA | Rancho Nuevo, Aldama, Tamaulipas, Mexico |
| 067_RN | NA | LKRNC066-21 | NA | Rancho Nuevo, Aldama,Tamaulipas, Mexico  |
| 068_RN | NA | LKRNC067-21 | NA | Rancho Nuevo, Aldama,Tamaulipas, Mexico  |
| 069_RN | NA | LKRNC068-21 | NA | Rancho Nuevo, Aldama, Tamaulipas, Mexico |
| 070_RN | NA | LKRNC069-21 | NA | Rancho Nuevo, Aldama,Tamaulipas, Mexico  |
| 071_RN | NA | LKRNC070-21 | NA | Rancho Nuevo, Aldama,Tamaulipas, Mexico  |
| 072_RN | NA | LKRNC071-21 | NA | Rancho Nuevo, Aldama, Tamaulipas, Mexico |
| 073_RN | NA | LKRNC072-21 | NA | Rancho Nuevo, Aldama,Tamaulipas, Mexico  |
| 074_RN | NA | LKRNC073-21 | NA | Rancho Nuevo, Aldama, Tamaulipas, Mexico |
| 075_RN | NA | LKRNC074-21 | NA | Rancho Nuevo, Aldama,Tamaulipas, Mexico  |
| 076_RN | NA | LKRNC075-21 | NA | Rancho Nuevo, Aldama,Tamaulipas, Mexico  |
| 077_RN | NA | LKRNC076-21 | NA | Rancho Nuevo, Aldama,Tamaulipas, Mexico  |
| 078_RN | NA | LKRNC077-21 | NA | Rancho Nuevo, Aldama, Tamaulipas, Mexico |
| 079_RN | NA | LKRNC078-21 | NA | Rancho Nuevo, Aldama,Tamaulipas, Mexico  |
| 080_RN | NA | LKRNC079-21 | NA | Rancho Nuevo, Aldama,Tamaulipas, Mexico  |
| 081_RN | NA | LKRNC080-21 | NA | Rancho Nuevo, Aldama, Tamaulipas, Mexico |
| 082_RN | NA | LKRNC081-21 | NA | Rancho Nuevo, Aldama, Tamaulipas, Mexico |
| 083_RN | NA | LKRNC082-21 | NA | Rancho Nuevo, Aldama, Tamaulipas, Mexico |
| 085_RN | NA | LKRNC084-21 | NA | Rancho Nuevo, Aldama, Tamaulipas, Mexico |
| 090_RN | NA | LKRNC089-21 | NA | Rancho Nuevo, Aldama, Tamaulipas, Mexico |
| 091_RN | NA | LKRNC090-21 | NA | Rancho Nuevo, Aldama, Tamaulipas, Mexico |
| 092_RN | NA | LKRNC091-21 | NA | Rancho Nuevo, Aldama,Tamaulipas, Mexico  |
| 094_RN | NA | LKRNC092-21 | NA | Rancho Nuevo, Aldama,Tamaulipas, Mexico  |

|                |           |       |              |          |                                            |                         |
|----------------|-----------|-------|--------------|----------|--------------------------------------------|-------------------------|
|                | 095_RN    | NA    | LKRNC093-21  | NA       | Rancho Nuevo, Aldama,Tamaulipas, Mexico    |                         |
|                | 098_RN    | NA    | LKRNC096-21  | NA       | Rancho Nuevo, Aldama,Tamaulipas, Mexico    |                         |
|                | 099_RN    | NA    | LKRNC097-21  | NA       | Rancho Nuevo, Aldama, Tamaulipas, México   |                         |
|                | 101_RN    | NA    | LKRNC098-21  | NA       | Rancho Nuevo, Aldama,Tamaulipas, Mexico    |                         |
|                | 102_RN    | NA    | LKRNC099-21  | NA       | Rancho Nuevo, Aldama,Tamaulipas, Mexico    |                         |
|                | 103_RN    | NA    | LKRNC100-21  | NA       | Rancho Nuevo, Aldama, Tamaulipas, Mexico   |                         |
|                | 104_RN    | NA    | LKRNC101-21  | NA       | Rancho Nuevo, Aldama,Tamaulipas, Mexico    |                         |
|                | 105_RN    | NA    | LKRNC102-21  | NA       | Rancho Nuevo, Aldama, Tamaulipas, Mexico   |                         |
|                | 106_RN    | NA    | LKRNC103-21  | NA       | Rancho Nuevo, Aldama, Tamaulipas, Mexico   |                         |
|                | 110_RN    | NA    | LKRNC111-21  | NA       | Rancho Nuevo, Aldama, Tamaulipas, Mexico   |                         |
|                | 111_RN    | NA    | LKRNC106-21  | NA       | Rancho Nuevo, Aldama, Tamaulipas, Mexico   |                         |
|                | 112_RN    | NA    | LKRNC107-21  | NA       | Rancho Nuevo, Aldama,Tamaulipas, Mexico    |                         |
|                | 113_RN    | NA    | LKRNC108-21  | NA       | Rancho Nuevo, Aldama, Tamaulipas, Mexico   |                         |
|                | 114_RN    | NA    | LKRNC109-21  | NA       | Rancho Nuevo, Aldama,Tamaulipas, Mexico    |                         |
| <b>LK-RN02</b> | 037_RN    | NA    | LKRNC054-21  | NA       | Rancho Nuevo, Aldama, Tamaulipas, Mexico   |                         |
| <b>LK-RN03</b> | 084_RN    | NA    | LKRNC083-21  | NA       | Rancho Nuevo, Aldama, Tamaulipas, Mexico   |                         |
| <b>LK-RN04</b> | 096_RN    | NA    | LKRNC094-21  | NA       | Rancho Nuevo, Aldama, Tamaulipas, Mexico   |                         |
|                | 001_BT    | NA    | LKRNC036-21  | NA       | Barra del Tordo, Aldama,Tamaulipas, Mexico |                         |
|                | 061USA**  | LK-A1 | BENT061-08   | GQ152891 | Nueva York, United States                  | Naro-Maciel et al. 2010 |
|                |           |       |              |          |                                            | Naro-Maciel et al.      |
|                | 062USA**  | LK-A1 | BENT062-08   | GQ152891 | Nueva York, United States                  | 2010                    |
|                |           |       |              |          |                                            | Naro-Maciel et al.      |
|                | 063USA**  | LK-A1 | BENT063-08   | GQ152891 | Nueva York, United States                  | 2010                    |
|                |           |       |              |          |                                            | Naro-Maciel et al.      |
|                | 064USA**  | LK-A1 | BENT064-08   | GQ152891 | Nueva York, United States                  | 2010                    |
|                |           |       |              |          |                                            | Naro-Maciel et al.      |
|                | 065USA**  | LK-A1 | BENT065-08   | GQ152891 | Nueva York, United States                  | 2010                    |
|                | 1768JX**  | NA    | GBGC11768-13 | JX454982 | South Padre Island, Texas, United States   | This work               |
|                | 1769JX ** | NA    | GBGC11769-13 | JX454981 | South Padre Island, Texas, United States   | This work               |

|           |        |                |    |          |                                          |                      |
|-----------|--------|----------------|----|----------|------------------------------------------|----------------------|
| LK-COI-01 | MN61LK | SPI Nest 23    | NA | MN136061 | South Padre Island, Texas, United States | Frandsen et al. 2020 |
|           | MN60LK | SPI Nest 6     | NA | MN136060 | South Padre Island, Texas, United States | Frandsen et al. 2020 |
|           | MN59LK | SPI Nest 13    | NA | MN136059 | South Padre Island, Texas, United States | Frandsen et al. 2020 |
|           | MN58LK | SPI Nest 3     | NA | MN136058 | South Padre Island, Texas, United States | Frandsen et al. 2020 |
|           | MN57LK | East Coast MT1 | NA | MN136057 | East Coast, United States                | Frandsen et al. 2020 |
|           | MN56LK | SPI Nest 27    | NA | MN136056 | South Padre Island, Texas, United States | Frandsen et al. 2020 |
|           | MN55LK | SPI Nest 1     | NA | MN136055 | South Padre Island, Texas, United States | Frandsen et al. 2020 |
|           | MN54LK | East Coast BR1 | NA | MN136054 | East Coast, United States                | Frandsen et al. 2020 |
|           | MN53LK | SPI Nest 14    | NA | MN136053 | South Padre Island, Texas, United States | Frandsen et al. 2020 |
|           | MN52LK | SPI Nest 16    | NA | MN136052 | South Padre Island, Texas, United States | Frandsen et al. 2020 |

---

\*Dead hatching samples; \*\*Unknown samples.
